# Supplementary material for: Diagnostic performance of the Minimal Eating Observation and Nutrition Form - Version II (MEONF-II) and Nutritional Risk Screening 2002 (NRS 2002) among hospital inpatients - a cross-sectional study
Source: PubMed Central journal article supplement (PMC3305676; doi:10.1186/1472-6955-10-24), 2011-12-20
Supplement: 1472-6955-10-24-S1.pdf [file 1472-6955-10-24-S1.pdf]

**Additional file 1**

**MEONF-II (Minimal Eating Observation and Nutrition Form – Version II)**

|                                                                                                                                                                                                    |                                                                                                                                                                                                                                                                                                                             | POINTS                                                                                                     |
|----------------------------------------------------------------------------------------------------------------------------------------------------------------------------------------------------|-----------------------------------------------------------------------------------------------------------------------------------------------------------------------------------------------------------------------------------------------------------------------------------------------------------------------------|------------------------------------------------------------------------------------------------------------|
| 1                                                                                                                                                                                                  | Unintentional weight loss (regardless of time & magnitude)                                                                                                                                                                                                                                                                  | Yes, weight loss = 2<br>No weight loss = 0<br>Don't know = leave empty and continue                        |
| 2a                                                                                                                                                                                                 | <input type="checkbox"/> BMI is less than 20 (69 years or younger)<br><input type="checkbox"/> BMI is less than 22 (70 years or older)<br>Height / weight cannot be obtained, measure calf circumference (2b)                                                                                                               | Low BMI or small calf circumference = 1<br>Otherwise = 0                                                   |
| 2b                                                                                                                                                                                                 | <input type="checkbox"/> Calf circumference is less than 31 centimeters                                                                                                                                                                                                                                                     |                                                                                                            |
| 3                                                                                                                                                                                                  | Eating problems (mark with check on left and score according to instructions on right)<br>Food intake<br><input type="checkbox"/> Difficult to maintain good sitting position during meals<br><input type="checkbox"/> Difficulty manipulating food on plate<br><input type="checkbox"/> Difficulty conveying food to mouth | One/more problems = 1<br>No problems = 0                                                                   |
| 4                                                                                                                                                                                                  | Swallowing/mouth<br><input type="checkbox"/> Difficulty chewing<br><input type="checkbox"/> Difficulty coping with food in mouth<br><input type="checkbox"/> Difficulty swallowing                                                                                                                                          | One/more problems = 1<br>No issues = 0                                                                     |
| 5                                                                                                                                                                                                  | Energy/appetite<br><input type="checkbox"/> Eats less than ¾ of food served<br><input type="checkbox"/> Lacks energy to complete an entire meal<br><input type="checkbox"/> Poor appetite                                                                                                                                   | One/more problems = 2<br>No problems = 0                                                                   |
| 6                                                                                                                                                                                                  | Clinical signs indicate risk of undernutrition. Assess e.g., body morphology, subcutaneous fat, muscle mass, grip strength, edema (fluid retention), blood tests (e.g. serum albumin).                                                                                                                                      | Clinical signs indicate risk = 1<br>Otherwise = 0                                                          |
| Tally observations 1-6<br>(min = 0, max = 8)                                                                                                                                                       |                                                                                                                                                                                                                                                                                                                             | TOTAL:                                                                                                     |
| <b>RISK OF UNDERNUTRITION</b><br><input type="checkbox"/> 0-2 points, no or low risk<br><input type="checkbox"/> 3-4 points, moderate risk<br><input type="checkbox"/> 5 points or more, high risk |                                                                                                                                                                                                                                                                                                                             |                                                                                                            |
| Gradation of high BMI<br>Overweight:<br>25-29.9 (69 years or younger)<br>27-31.9 (70 years or older)<br><input type="checkbox"/>                                                                   | Obesity:<br>30-39.9 (69 years or younger)<br>32-41.9 (70 years or older)<br><input type="checkbox"/>                                                                                                                                                                                                                        | Severe/morbid obesity:<br>>40 (69 years or younger)<br>>42 (70 years or older)<br><input type="checkbox"/> |
